# Supplementary material for: Ultra-high sensitivity of multicolor Sm3+-doped LiSrVO4 phosphors for contactless optical thermometers
Source: Royal Society of Chemistry journal article supplement (doi:10.1039/d0dt01907k), 2020-01-01
Supplement: d0dt01907k1.pdf [file d0dt01907k1.pdf]

## Ultra-high sensitivity of multicolor Sm<sup>3+</sup>-doped LiSrVO<sub>4</sub> phosphors for contactless optical thermometer

Peng Du\*, Yafei Hou, Weiping Li, Laihui Luo\*

*<sup>a</sup>Department of Microelectronic Science and Engineering, School of Physical Science and Technology, Ningbo University, 315211 Ningbo, Zhejiang, China*

Corresponding author: dp2007good@sina.com or dupeng@nbu.edu.cn (P. Du);  
luolaihui@nbu.edu.cn (L. Luo)

**Table S1.** CIE coordinates and CCT values of the LiSrVO<sub>4</sub>:xSm<sup>3+</sup> phosphors as a function of Sm<sup>3+</sup> ion concentration.

| Compounds                                  | CIE coordinates |          | CCT    |
|--------------------------------------------|-----------------|----------|--------|
|                                            | <i>x</i>        | <i>y</i> |        |
| LiSrVO <sub>4</sub>                        | 0.374           | 0.470    | 4578 K |
| LiSrVO <sub>4</sub> :0.005Sm <sup>3+</sup> | 0.437           | 0.446    | 3303 K |
| LiSrVO <sub>4</sub> :0.01Sm <sup>3+</sup>  | 0.449           | 0.447    | 3124 K |
| LiSrVO <sub>4</sub> :0.03Sm <sup>3+</sup>  | 0.464           | 0.434    | 2818 K |
| LiSrVO <sub>4</sub> :0.05Sm <sup>3+</sup>  | 0.469           | 0.428    | 2706 K |
| LiSrVO <sub>4</sub> :0.07Sm <sup>3+</sup>  | 0.469           | 0.422    | 2661 K |

**Table S2.** CIE coordinates of the  $\text{LiSrVO}_4:0.01\text{Sm}^{3+}$  phosphors as a function of temperature.

| Compounds                            | Temperature | CIE coordinates |       |
|--------------------------------------|-------------|-----------------|-------|
|                                      |             | $x$             | $y$   |
| $\text{LiSrVO}_4:0.01\text{Sm}^{3+}$ | 303 K       | 0.449           | 0.447 |
| $\text{LiSrVO}_4:0.01\text{Sm}^{3+}$ | 313 K       | 0.462           | 0.430 |
| $\text{LiSrVO}_4:0.01\text{Sm}^{3+}$ | 323 K       | 0.476           | 0.423 |
| $\text{LiSrVO}_4:0.01\text{Sm}^{3+}$ | 333 K       | 0.490           | 0.414 |
| $\text{LiSrVO}_4:0.01\text{Sm}^{3+}$ | 343 K       | 0.504           | 0.408 |
| $\text{LiSrVO}_4:0.01\text{Sm}^{3+}$ | 353 K       | 0.517           | 0.402 |
| $\text{LiSrVO}_4:0.01\text{Sm}^{3+}$ | 363 K       | 0.529           | 0.398 |
| $\text{LiSrVO}_4:0.01\text{Sm}^{3+}$ | 373 K       | 0.539           | 0.394 |
| $\text{LiSrVO}_4:0.01\text{Sm}^{3+}$ | 383 K       | 0.548           | 0.392 |

**Table S3.** Maximum  $S_a$  and  $S_r$  values of the  $\text{LiSrVO}_4:0.005\text{Sm}^{3+}$ ,  $\text{LiSrVO}_4:0.01\text{Sm}^{3+}$  and  $\text{LiSrVO}_4:0.05\text{Sm}^{3+}$  phosphors.

| Compounds                             | $S_a$                 | $S_r$                  |
|---------------------------------------|-----------------------|------------------------|
| $\text{LiSrVO}_4:0.005\text{Sm}^{3+}$ | 0.071 K <sup>-1</sup> | 2.253% K <sup>-1</sup> |
| $\text{LiSrVO}_4:0.01\text{Sm}^{3+}$  | 1.076 K <sup>-1</sup> | 6.167% K <sup>-1</sup> |
| $\text{LiSrVO}_4:0.05\text{Sm}^{3+}$  | 0.048 K <sup>-1</sup> | 1.394% K <sup>-1</sup> |

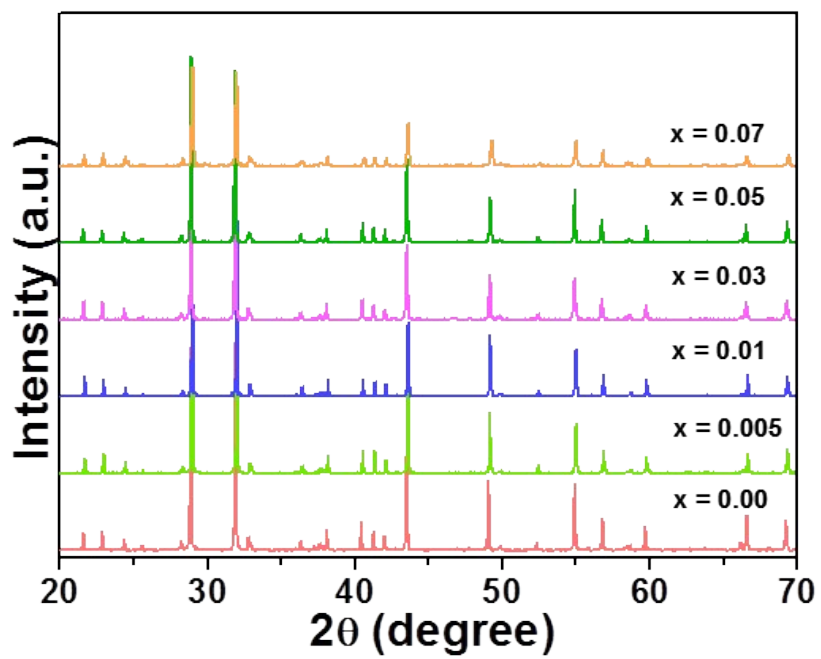

**Figure S1** XRD patterns of the  $\text{LiSrVO}_4:x\text{Sm}^{3+}$  phosphors as a function of  $\text{Sm}^{3+}$  ion content.

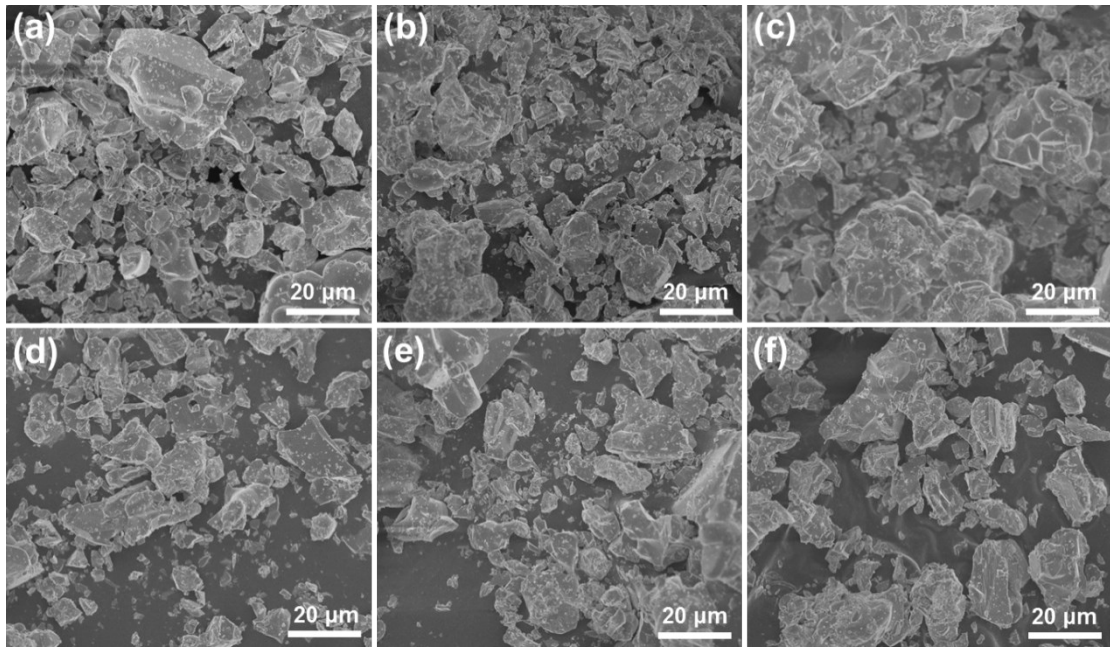

**Figure S2.** FE-SEM images of  $\text{LiSrVO}_4\text{:}x\text{Sm}^{3+}$  (a)  $x = 0.00$ , (b)  $x = 0.005$ , (c)  $x = 0.01$ , (d)  $x = 0.03$ , (e)  $x = 0.05$  and (f)  $x = 0.07$  phosphors.

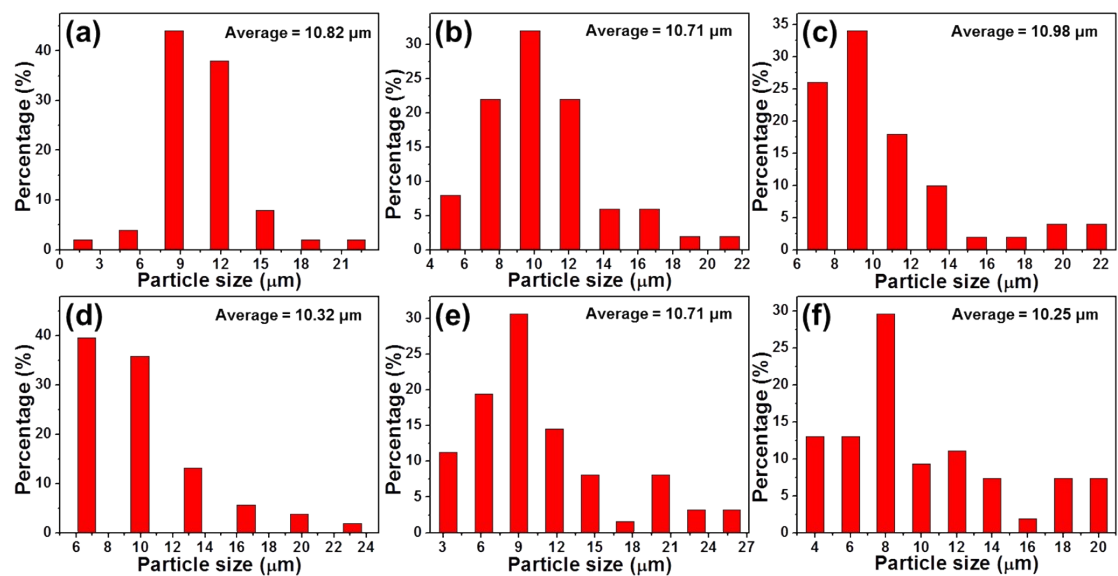

**Figure S3.** Particle size distribution  $\text{LiSrVO}_4:x\text{Sm}^{3+}$  (a)  $x = 0.00$ , (b)  $x = 0.005$ , (c)  $x = 0.01$ , (d)  $x = 0.03$ , (e)  $x = 0.05$  and (f)  $x = 0.07$  phosphors.

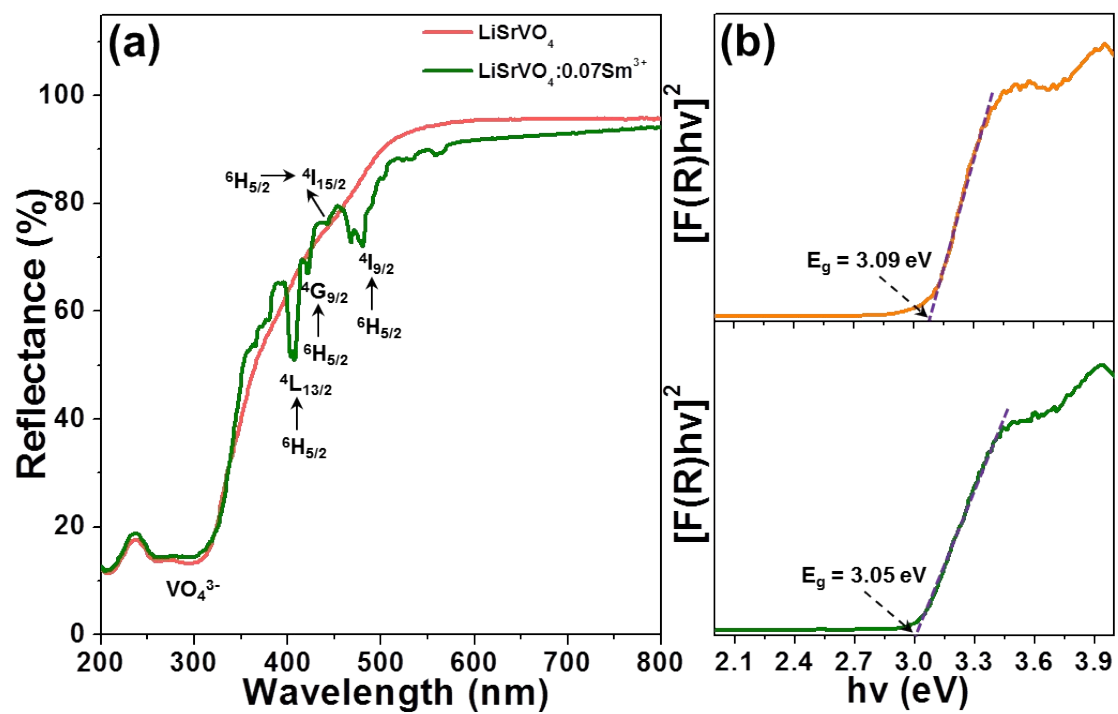

**Figure S4.** (a) UV-Vis DRS spectra of the  $\text{LiSrVO}_4$  and  $\text{LiSrVO}_4:0.01\text{Sm}^{3+}$  phosphors. The determination of the optical band gap of (b)  $\text{LiSrVO}_4$  and (c)  $\text{LiSrVO}_4:0.01\text{Sm}^{3+}$  phosphors.

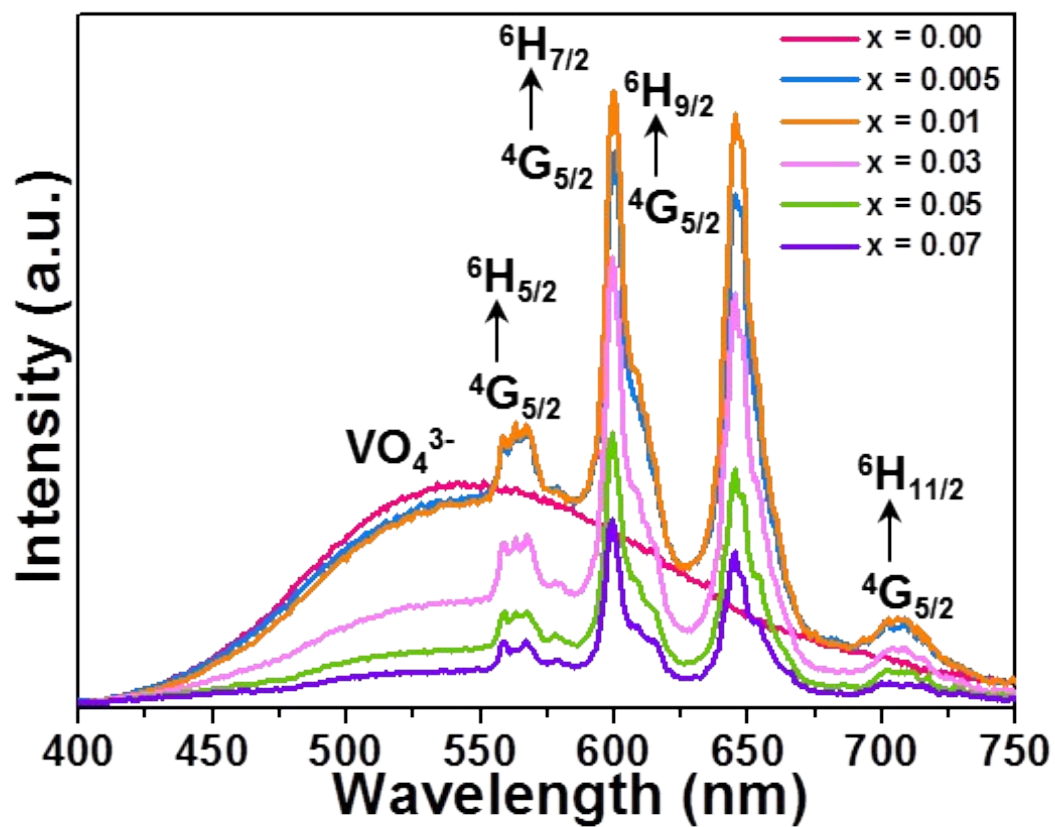

**Figure S5.** Emission spectra of the  $\text{LiSrVO}_4:\text{xSm}^{3+}$  phosphors with different doping concentrations excited at 343 nm.

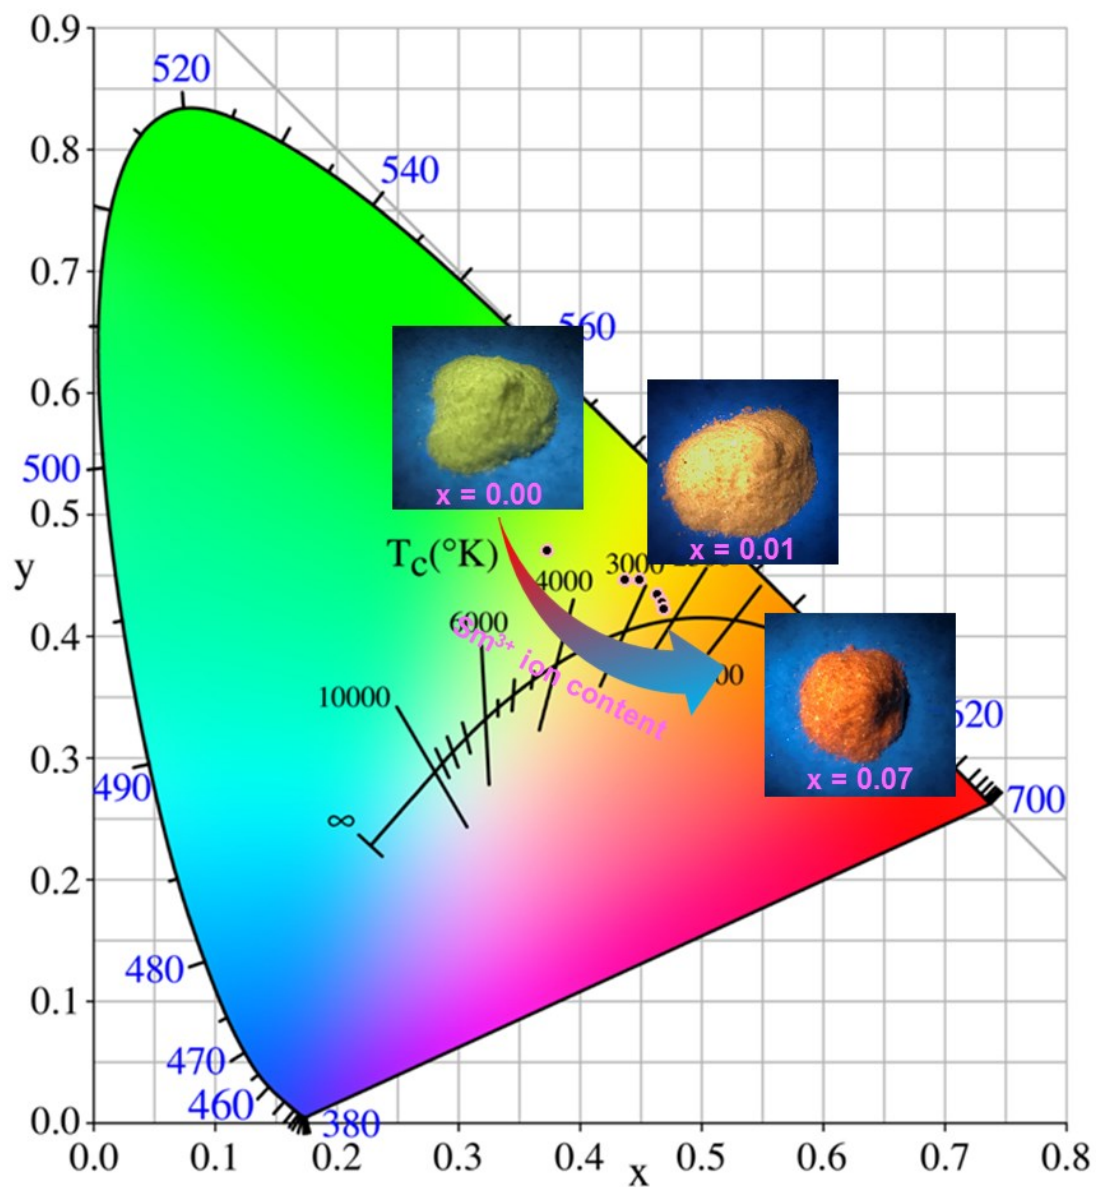

**Figure S6.** CIE chromaticity diagram of the  $\text{LiSrVO}_4:x\text{Sm}^{3+}$  phosphors. Inset shows the optical images of the resultant phosphors upon 365 nm lamp irradiation.



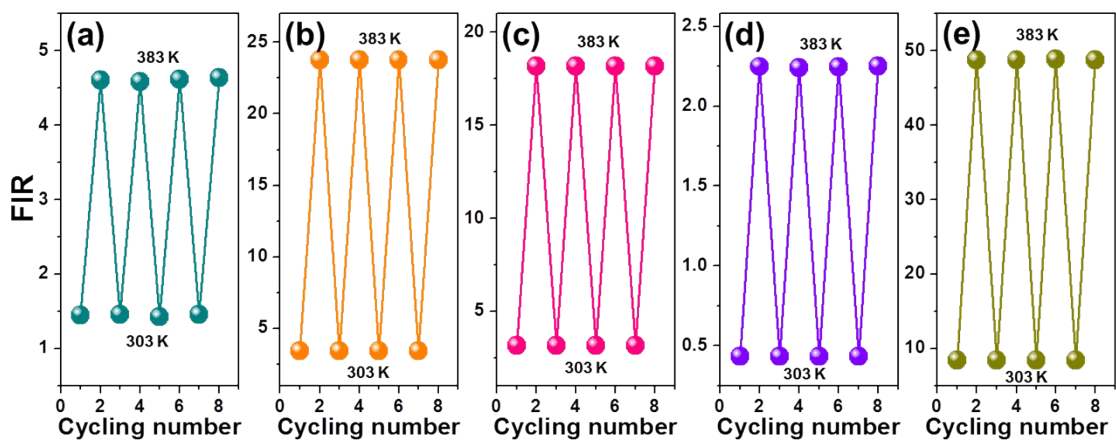

**Figure S7.** Temperature-induced switching of FIR values of (a)  ${}^6\text{H}_{5/2}/\text{VO}_4^{3-}$ , (b)  ${}^6\text{H}_{7/2}/\text{VO}_4^{3-}$ , (c)  ${}^6\text{H}_{9/2}/\text{VO}_4^{3-}$ , (d)  ${}^6\text{H}_{11/2}/\text{VO}_4^{3-}$  and (e) total integrated  ${}^6\text{H}_{11/2}/\text{VO}_4^{3-}$  of  $\text{LiSrVO}_4:0.01\text{Sm}^{3+}$  phosphors in the range of 303-383 K.

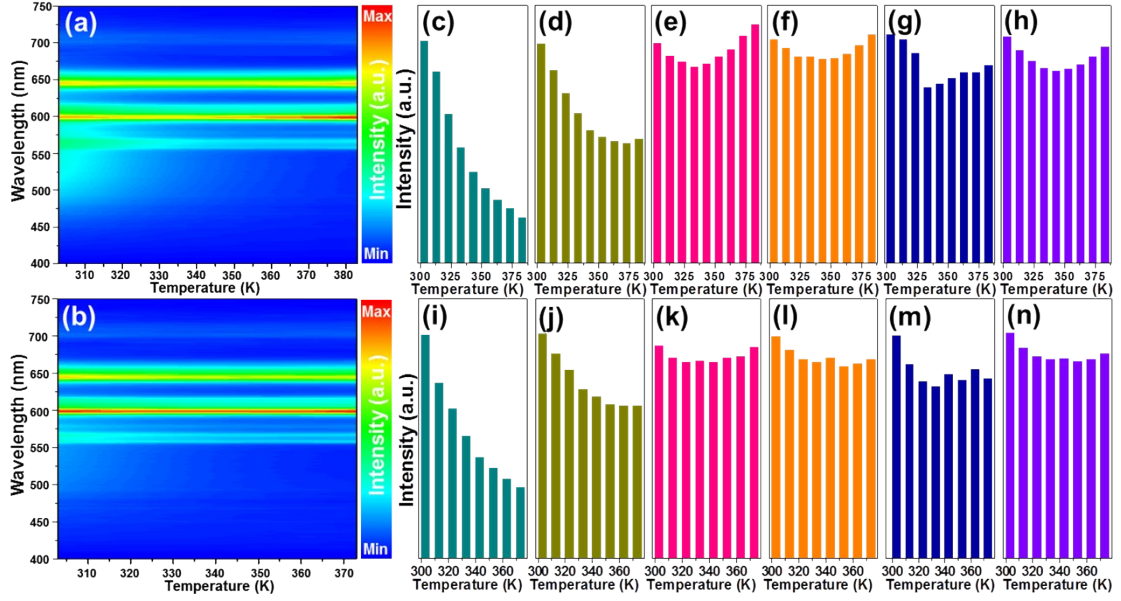

**Figure S8.** Contour mapping of thermal evolution emission spectra of (a) the  $\text{LiSrVO}_4:0.005\text{Sm}^{3+}$  and (b)  $\text{LiSrVO}_4:0.05\text{Sm}^{3+}$  phosphors. Temperature dependent emission intensities of (c)  $\text{VO}_4^{3-}$  group, (d)  ${}^4\text{G}_{5/2} \rightarrow {}^6\text{H}_{5/2}$  transition, (e)  ${}^4\text{G}_{5/2} \rightarrow {}^6\text{H}_{7/2}$  transition, (f)  ${}^4\text{G}_{5/2} \rightarrow {}^6\text{H}_{9/2}$  transition, (g)  ${}^4\text{G}_{5/2} \rightarrow {}^6\text{H}_{11/2}$  transition and (h) total integrated  ${}^4\text{G}_{5/2} \rightarrow {}^6\text{H}_J$  ( $J = 5/2, 7/2, 9/2, 11/2$ ) transitions. Temperature dependent emission intensities of (i)  $\text{VO}_4^{3-}$  group, (j)  ${}^4\text{G}_{5/2} \rightarrow {}^6\text{H}_{5/2}$  transition, (k)  ${}^4\text{G}_{5/2} \rightarrow {}^6\text{H}_{7/2}$  transition, (l)  ${}^4\text{G}_{5/2} \rightarrow {}^6\text{H}_{9/2}$  transition, (m)  ${}^4\text{G}_{5/2} \rightarrow {}^6\text{H}_{11/2}$  transition and (n) total integrated  ${}^4\text{G}_{5/2} \rightarrow {}^6\text{H}_J$  ( $J = 5/2, 7/2, 9/2, 11/2$ ) transitions.

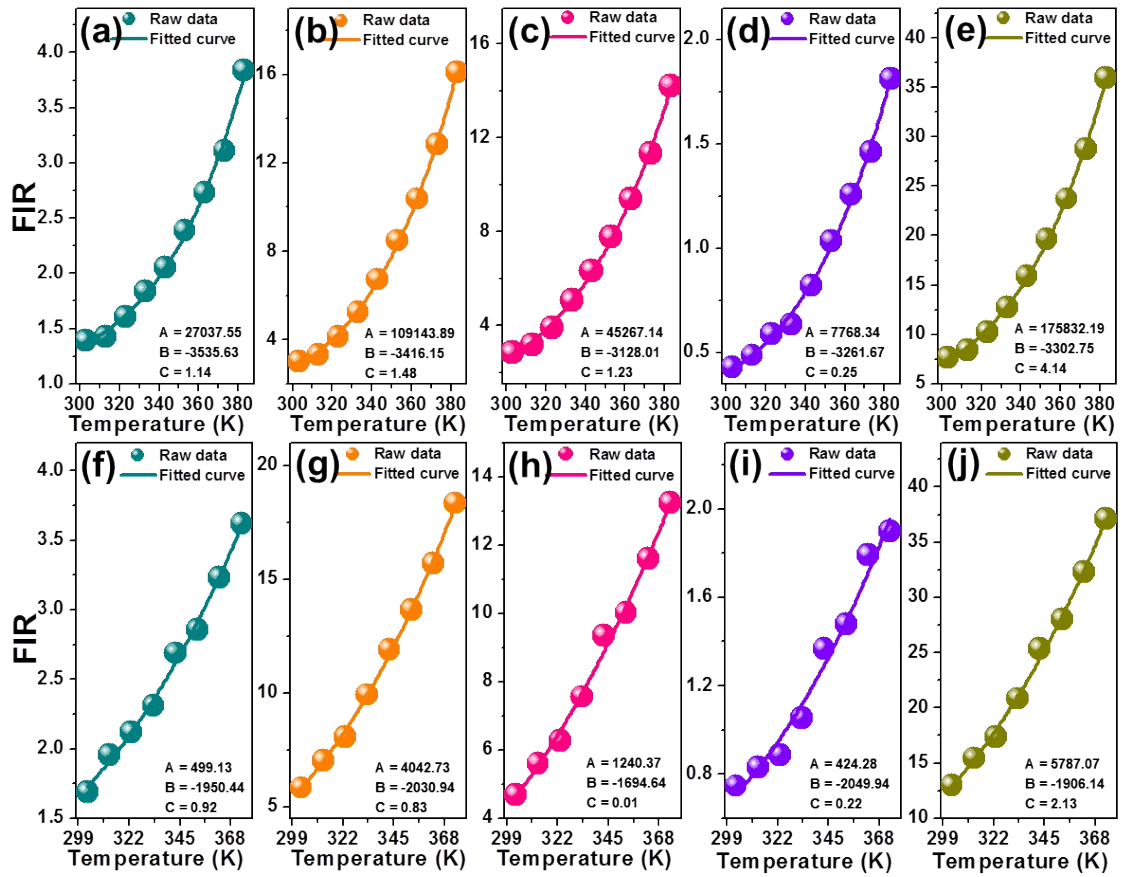

**Figure S9.** Temperature dependent FIR values of (a)  ${}^6\text{H}_{5/2}/\text{VO}_4^{3-}$ , (b)  ${}^6\text{H}_{7/2}/\text{VO}_4^{3-}$ , (c)  ${}^6\text{H}_{9/2}/\text{VO}_4^{3-}$ , (d)  ${}^6\text{H}_{11/2}/\text{VO}_4^{3-}$  and (e) total integrated  ${}^6\text{H}_{11/2}/\text{VO}_4^{3-}$  of  $\text{LiSrVO}_4:0.005\text{Sm}^{3+}$  phosphors. Temperature dependent FIR values of (f)  ${}^6\text{H}_{5/2}/\text{VO}_4^{3-}$ , (g)  ${}^6\text{H}_{7/2}/\text{VO}_4^{3-}$ , (h)  ${}^6\text{H}_{9/2}/\text{VO}_4^{3-}$ , (i)  ${}^6\text{H}_{11/2}/\text{VO}_4^{3-}$  and (j) total integrated  ${}^6\text{H}_{11/2}/\text{VO}_4^{3-}$  of  $\text{LiSrVO}_4:0.05\text{Sm}^{3+}$  phosphors.
